# Supplementary material for: Snapshots of ligand entry, malleable binding and induced helical movement in P-glycoprotein
Source: PubMed Central journal article supplement (PMC4356375; doi:10.1107/s1399004715000978), 2015-02-26
Supplement: d-71-00732-sup1.pdf [file d-71-00732-sup1.pdf]

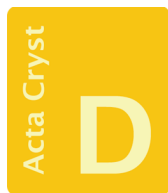

BIOLOGICAL  
CRYSTALLOGRAPHY

**Volume 71 (2015)**

**Supporting information for article:**

**Snapshots of ligand entry, malleable binding and induced helical movement in P-glycoprotein**

**Paul Szewczyk, Houchao Tao, Aaron P. McGrath, Mark Villaluz, Steven D. Rees, Sung Chang Lee, Rupak Doshi, Ina L. Urbatsch, Qinghai Zhang and Geoffrey Chang**

**Table S1** Solvent accessible surface area of cyclopeptide ligands buried in the pocket of P-gp as calculated by PISA(Krissinel & Henrick, 2007)

|              | Accessible Surface<br>Area (Å <sup>2</sup> ) | Buried Surface Area<br>(Å <sup>2</sup> ) |
|--------------|----------------------------------------------|------------------------------------------|
| QZ-Ala Upper | 628.7                                        | 451.6                                    |
| QZ-Ala Lower | 623.3                                        | 409.1                                    |
| QZ-Val Upper | 723.1                                        | 513.6                                    |
| QZ-Val Lower | 690.5                                        | 475.4                                    |
| QZ-Val Outer | 723.9                                        | 426.7                                    |
| QZ-Leu Upper | 824.1                                        | 577.5                                    |
| QZ-Phe Upper | 760.4                                        | 577.2                                    |
| QZ-Phe Lower | 783.9                                        | 474.8                                    |

**Figure S1** NMR spectra of QZ-Ala, QZ-Leu and QZ-Phe.  $^{13}\text{C}$  (top) and  $^1\text{H}$  (bottom) spectra are shown for each compound.

**Figure S2** Structure based alignment. Two views of P-gp depicting  $\text{C}_\alpha$  position shifts between the new (P-gp native at 3.4 Å, reported here) and previously published model (pdb code: 4KSB). Changes are depicted by color with red indicating the largest shift in  $\text{C}_\alpha$  position (8.35 Å). Alignments and pairwise  $\text{C}_\alpha$  RMSD calculations were calculated using the python module 'ColorByRMSD' within the PyMOL Molecular Graphics System (Schrödinger, LLC)

**Figure S3** Cytotoxicity of the homotrimeric cyclopeptide compounds to P-gp-over-expressing CR1R12, and parental control AuxB1, cells using Calcein-AM transport assay. P-gp mediates mild resistance to QZ-Ala. For QZ-Phe, full growth of inhibition was not observed due to limited solubility of this compound at high concentrations. The mean and SD of quadruplet experiments are shown; data were fit using the Hill equation. QZ-Ala, QZ-Val, QZ-Leu and QZ-Phe are drawn in green, blue, yellow and red curves, respectively. The concentrations are plotted in log scale.

**Figure S4** Sensitization of CR1R12 cells to the anti-cancer drug colchicine by homotrimeric cyclopeptides. Relative to parental control AUXB1 cells, P-gp-overexpressing CR1R12 cells are ~200 times more resistant to the anticancer drug colchicine (gray lines in all panes). Their 50% growth inhibition ( $\text{GI}_{50}$ ) values were 0.14  $\mu\text{M}$  and 27  $\mu\text{M}$  respectively. Presence of (a) QZ-Ala, green, (b) QZ-Val, blue, and (d) QZ-Phe, red, in the growth media sensitized the CR1R12 cells to colchicine in a concentration-dependent manner with full reversal of P-gp mediated multidrug resistance seen at 2  $\mu\text{M}$ ; this concentration gave essentially the same  $\text{GI}_{50}$  value as seen in AuxB1 cells. Presence of increasing concentrations of (c) QZ-Leu, yellow, also sensitized CR1R12 cells to colchicine, where full reversal of multidrug resistance was not observed because this compound became cytotoxic at higher concentrations. Shown are representative data from three independent experiments. The concentrations are plotted in log scale.

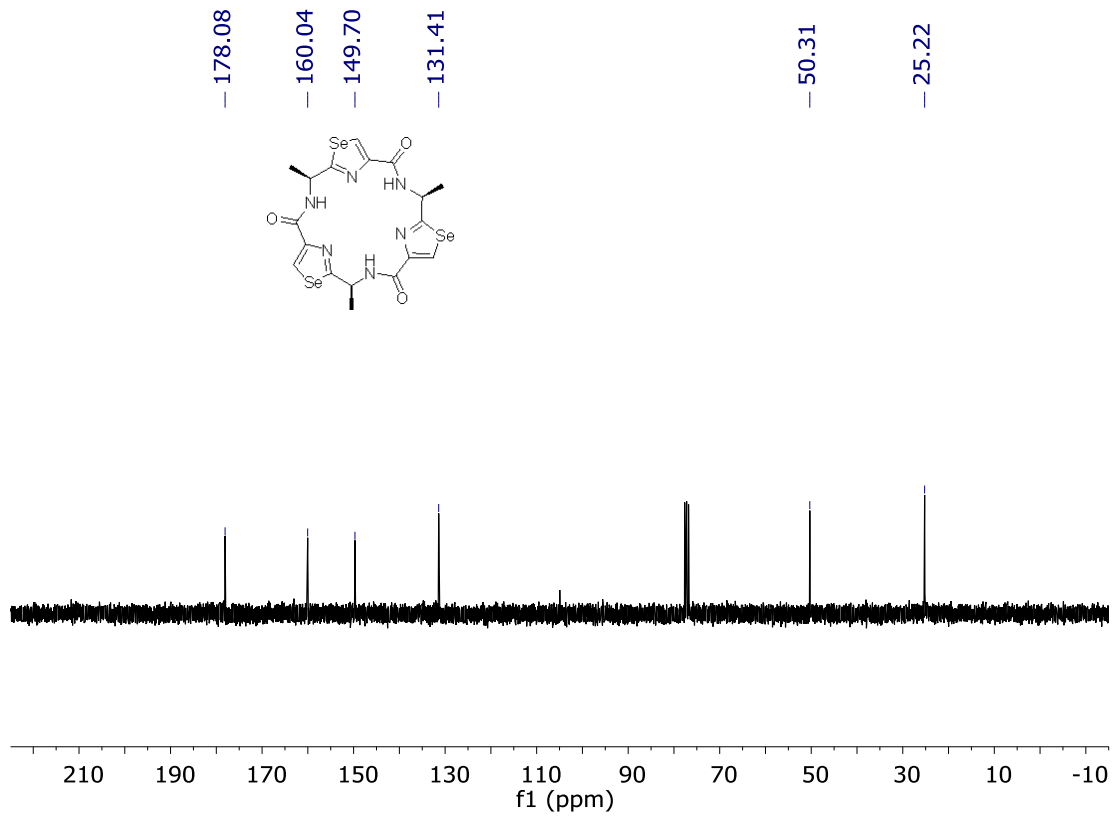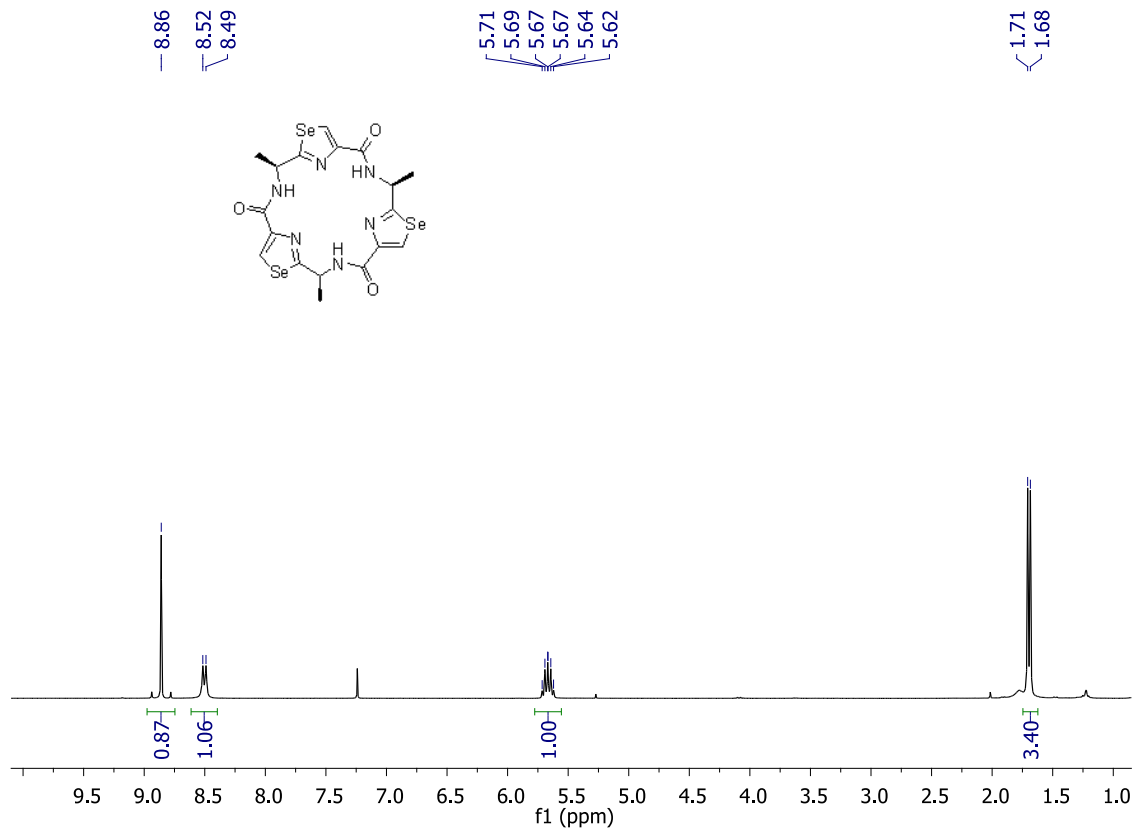

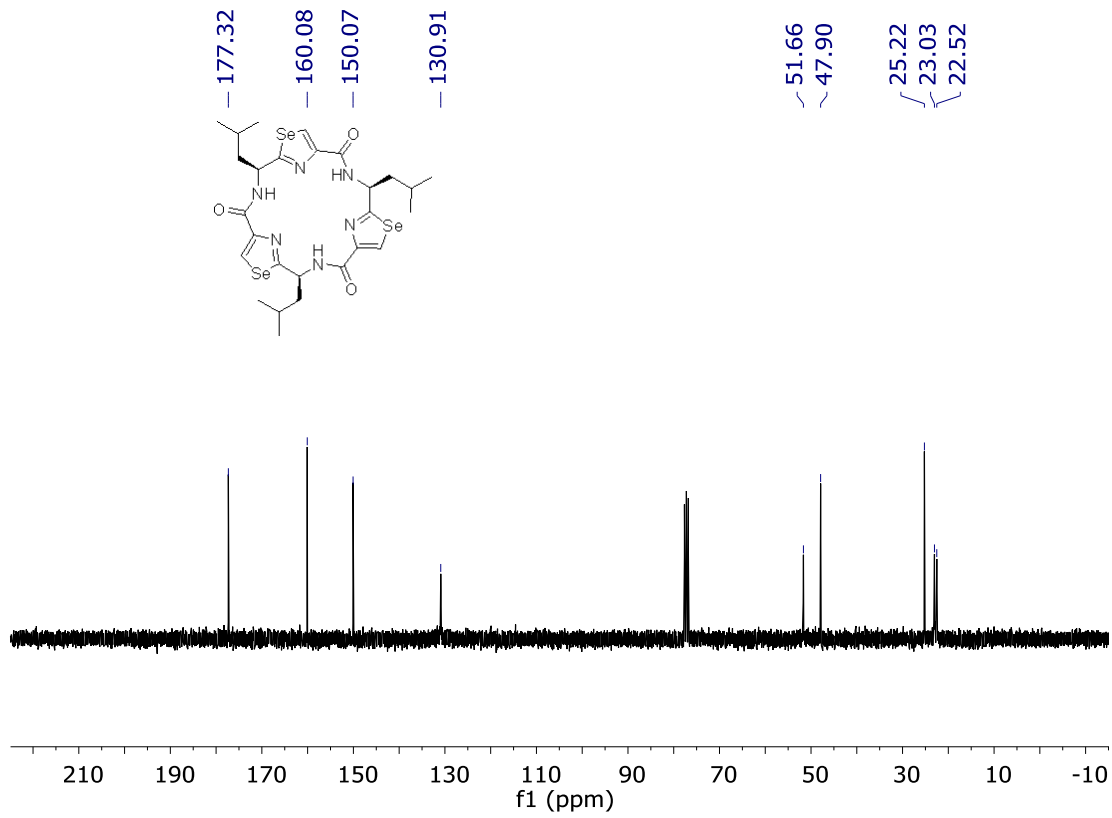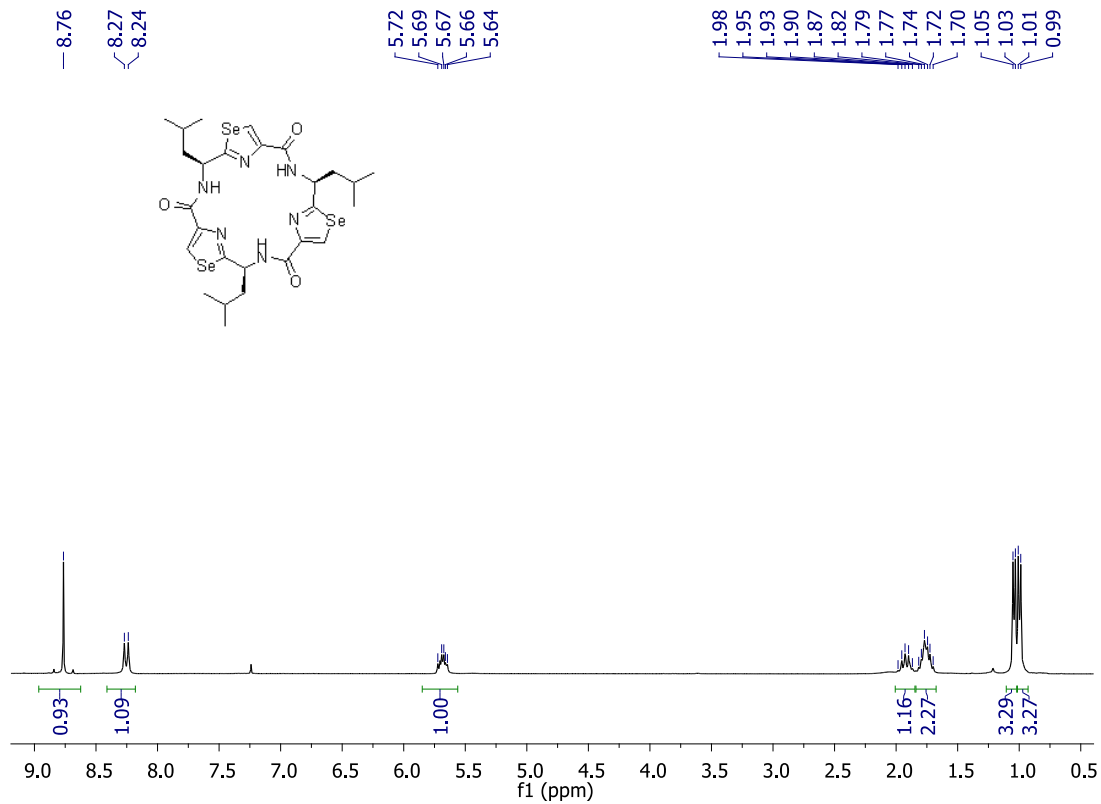

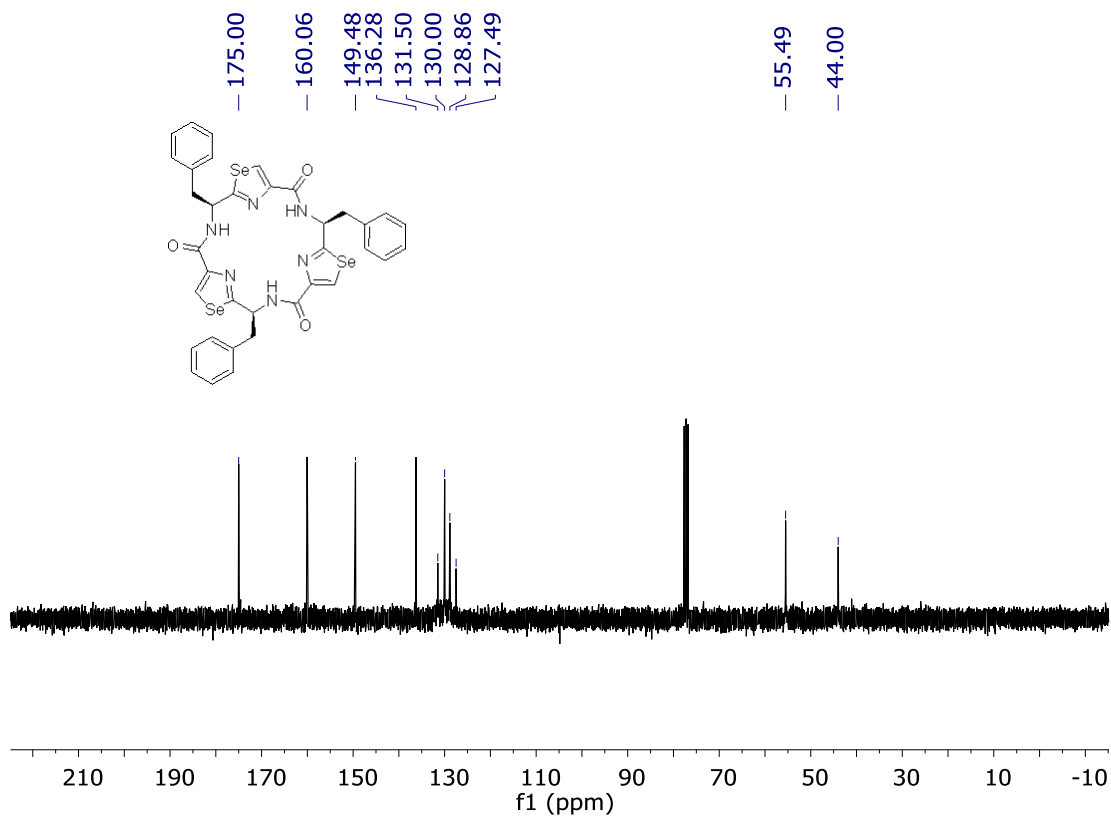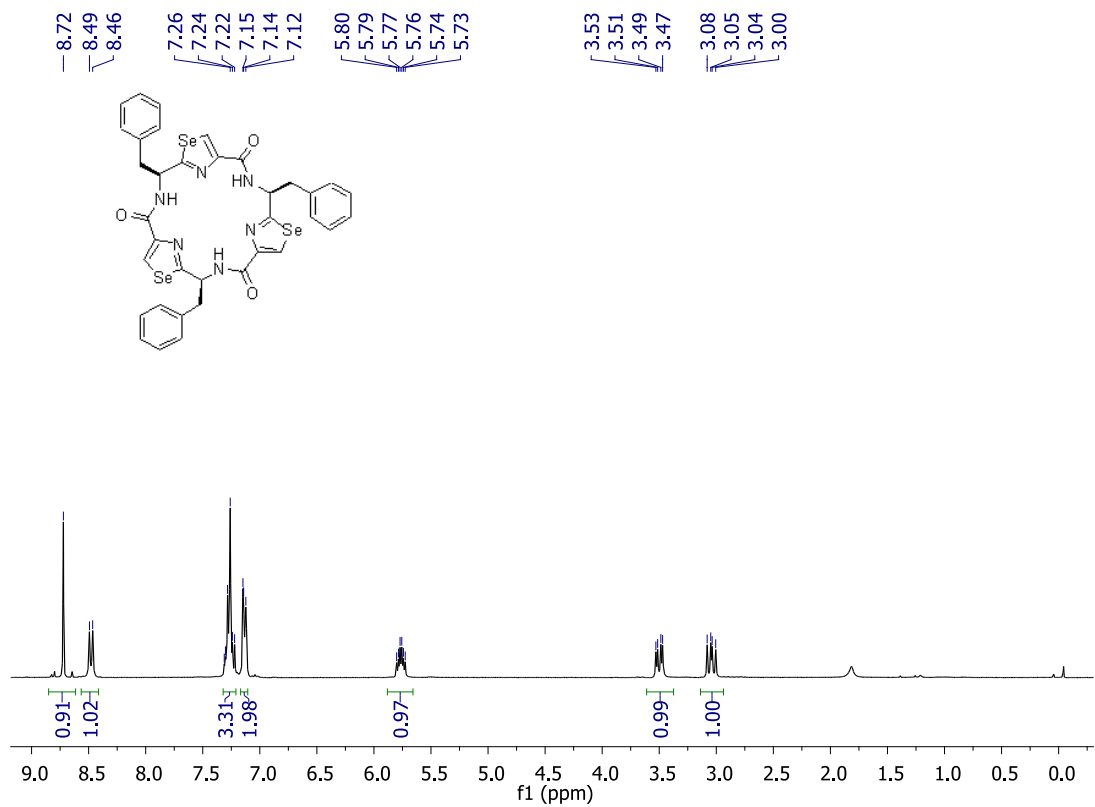

Supplementary Figure S1

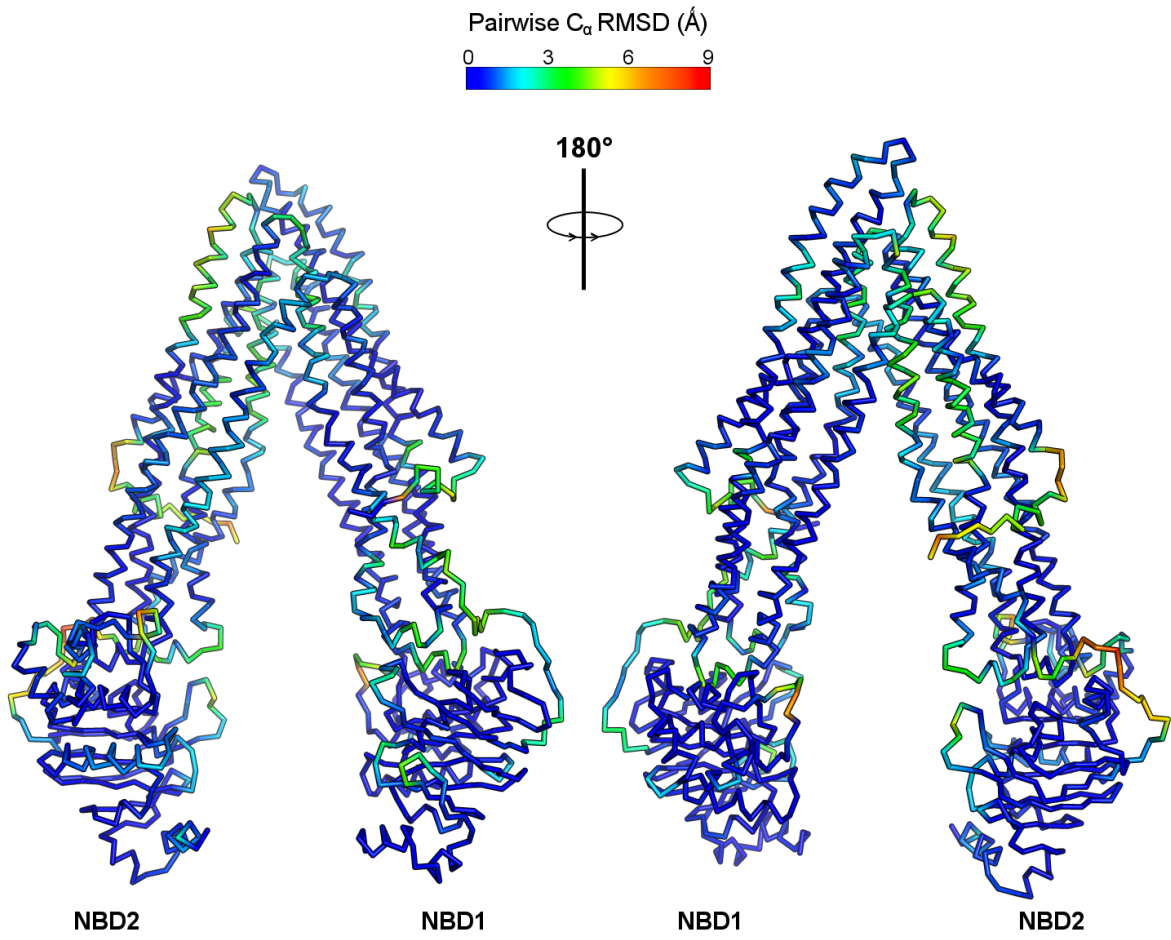

Supplementary Figure S2

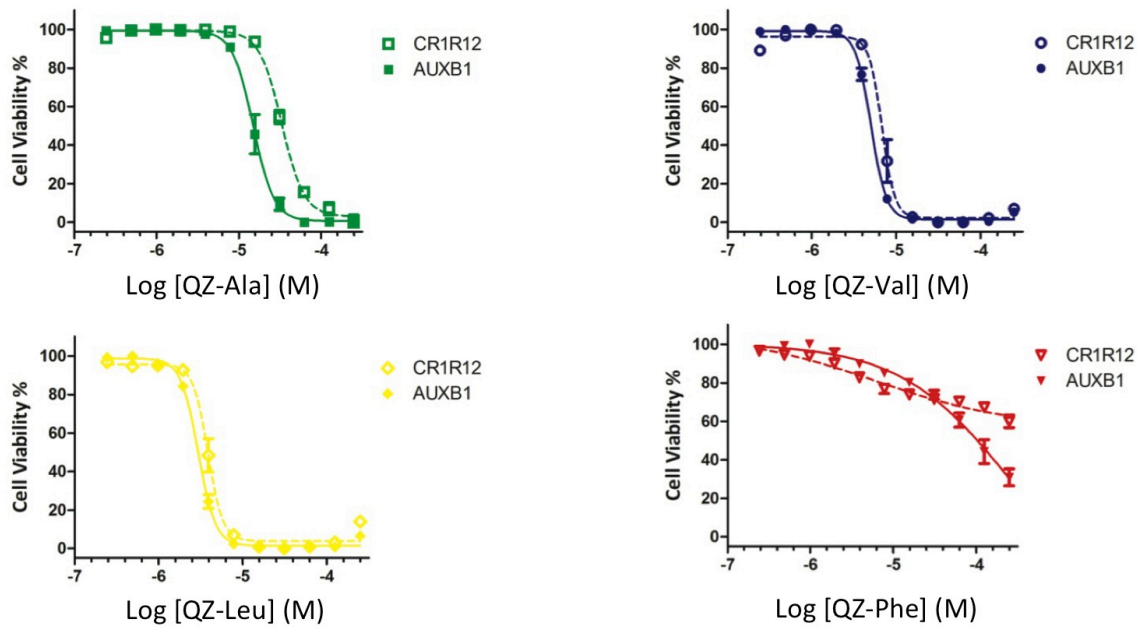

|        | toxicity (IC <sub>50</sub> μM)<br>CR1R12 / AUXB1 |
|--------|--------------------------------------------------|
| QZ-Ala | 32.1 ± 0.9 / 14.8 ± 0.5                          |
| QZ-Val | 7.1 ± 0.3 / 5.3 ± 0.1                            |
| QZ-Leu | 3.9 ± 0.1 / 3.1 ± 0.1                            |
| QZ-Phe | >100 μM / ~60 μM                                 |

**Supplementary Figure S3**



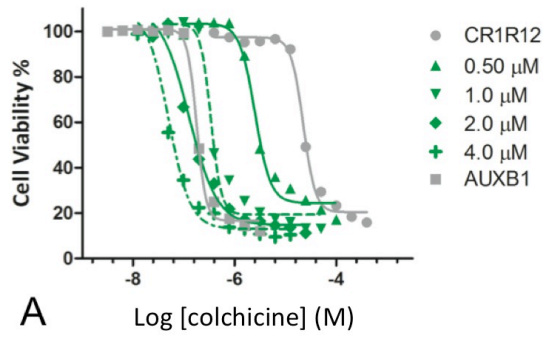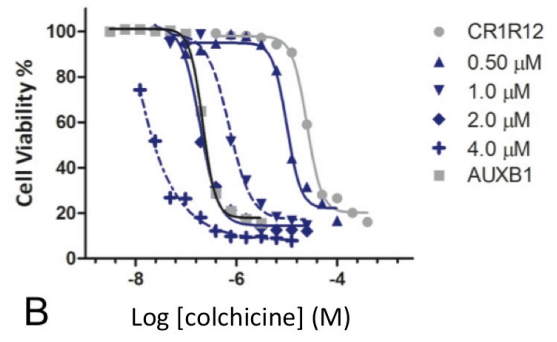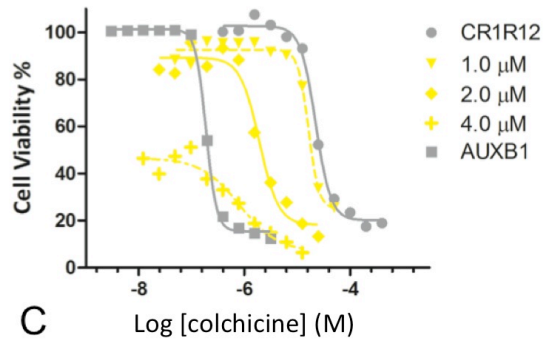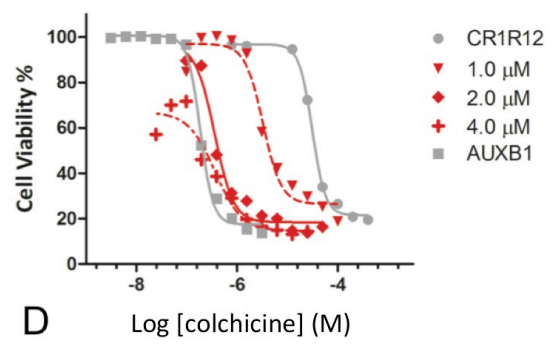

**Supplementary Figure S4**
